# Supplementary material for: An Explorative Analysis of ABCG2/TOP-1 mRNA Expression as a Biomarker Test for FOLFIRI Treatment in Stage III Colon Cancer Patients: Results from Retrospective Analyses of the PETACC-3 Trial
Source: MDPI journal article supplement (doi:10.3390/cancers12040977), 2020-04-15

## Supplementary Materials

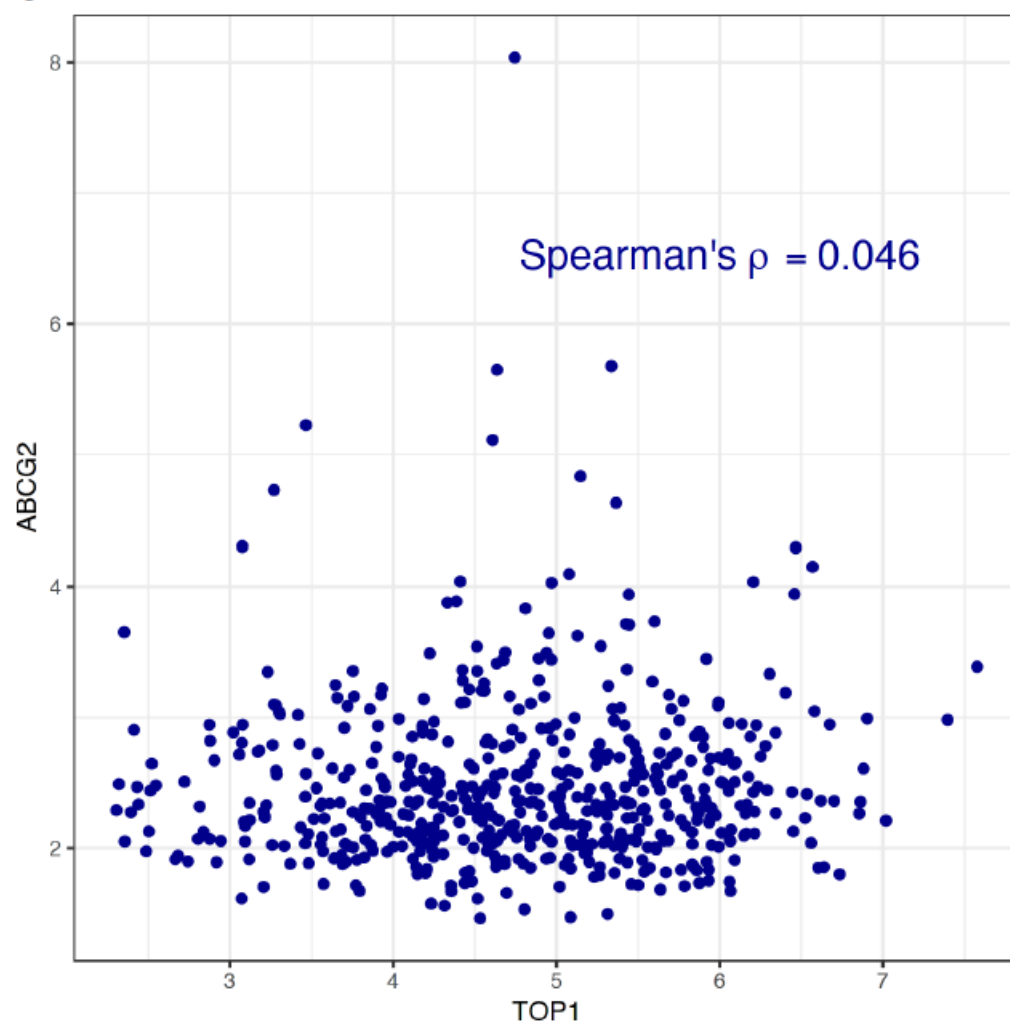

**Figure S1.** Scatter plot of log2-expression levels of ABCG2 and TOP1 genes.

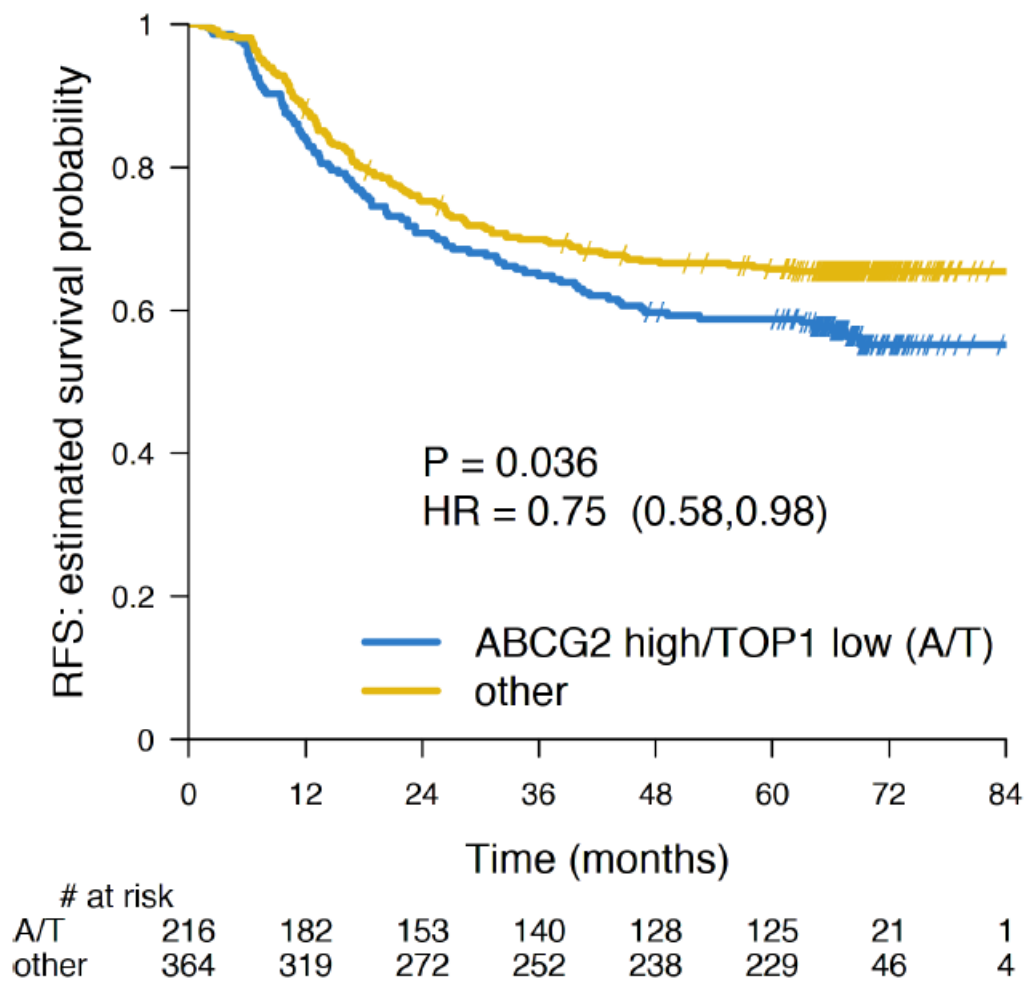

**Figure S2.** RFS stratified by biomarker in whole stage III. Survival plot (Kaplan-Meier estimates) of “resistant” and “sensitive” groups, as defined by the test, in the whole study population (all stage III,  $n = 580$ ).

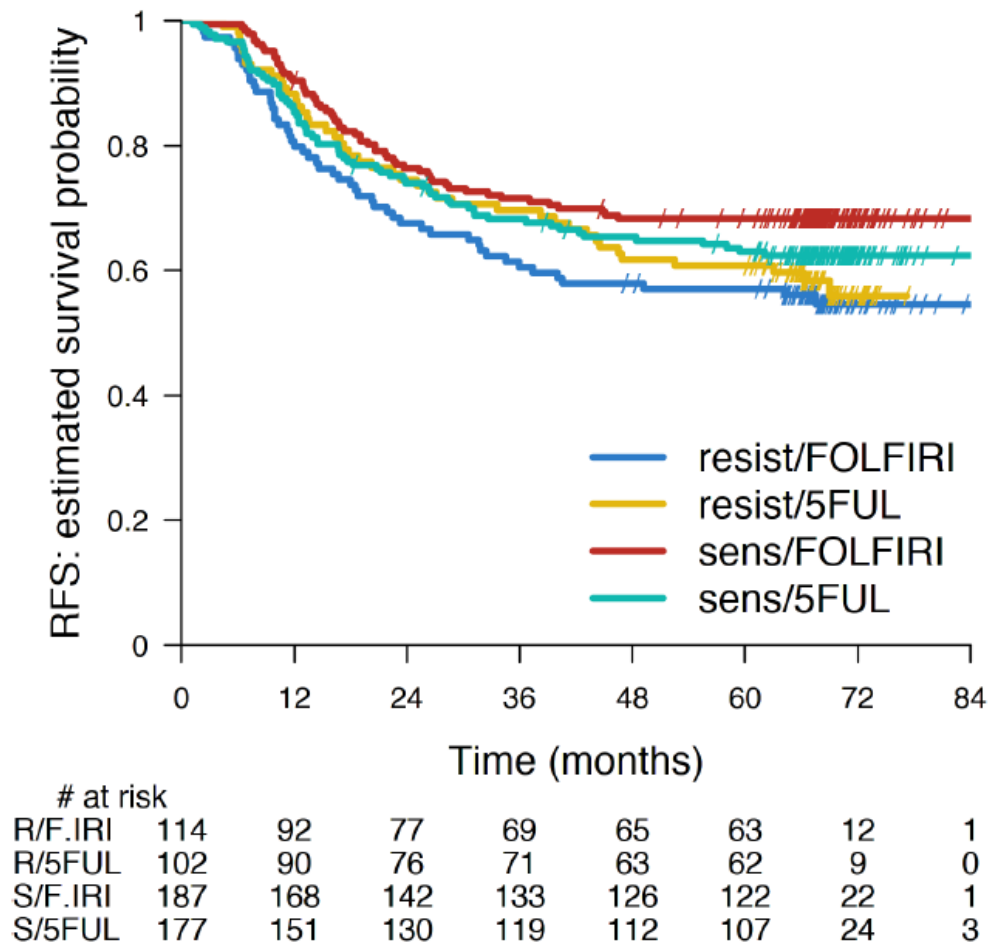

**Figure S3.** RFS stage III stratified by biomarker and treatment. Survival plot (Kaplan-Meier estimates) of “resistant” and “sensitive” groups under FOLFIRI treatment, and all 5FUL-only treated patients were pooled. While the “sensitive” patients treated with FOLFIRI seem to fare best among the three groups, the difference is not statistically significant when compared with 5FUL-treated group (HR: 0.77, 95%CI: (0.56–1.06);  $p = 0.11$ ). Abbreviations: “resistant” under FOLFIRI = “resist/FOLFIRI” = “R/F.IRI”, “sensitive” under 5FUL = “sens/5FUL” = “S/5FUL” etc.

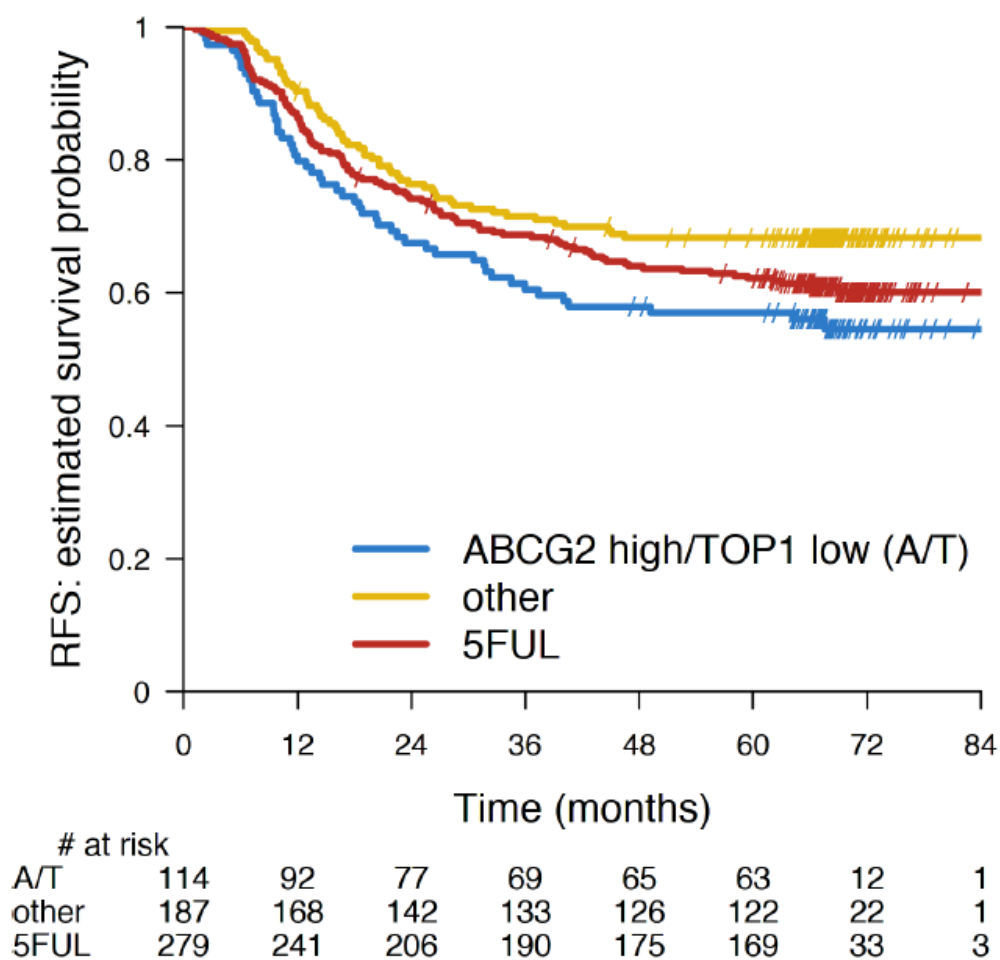

**Figure S4.** RFS in FOLFIRI by biomarker vs whole 5FUL arm. In both treatment arms, the patients were dichotomized by the biomarker test. However, although not reaching statistical significance, the “sensitive” patients in the FOLFIRI group appeared to have a better RFS than any of the other groups.

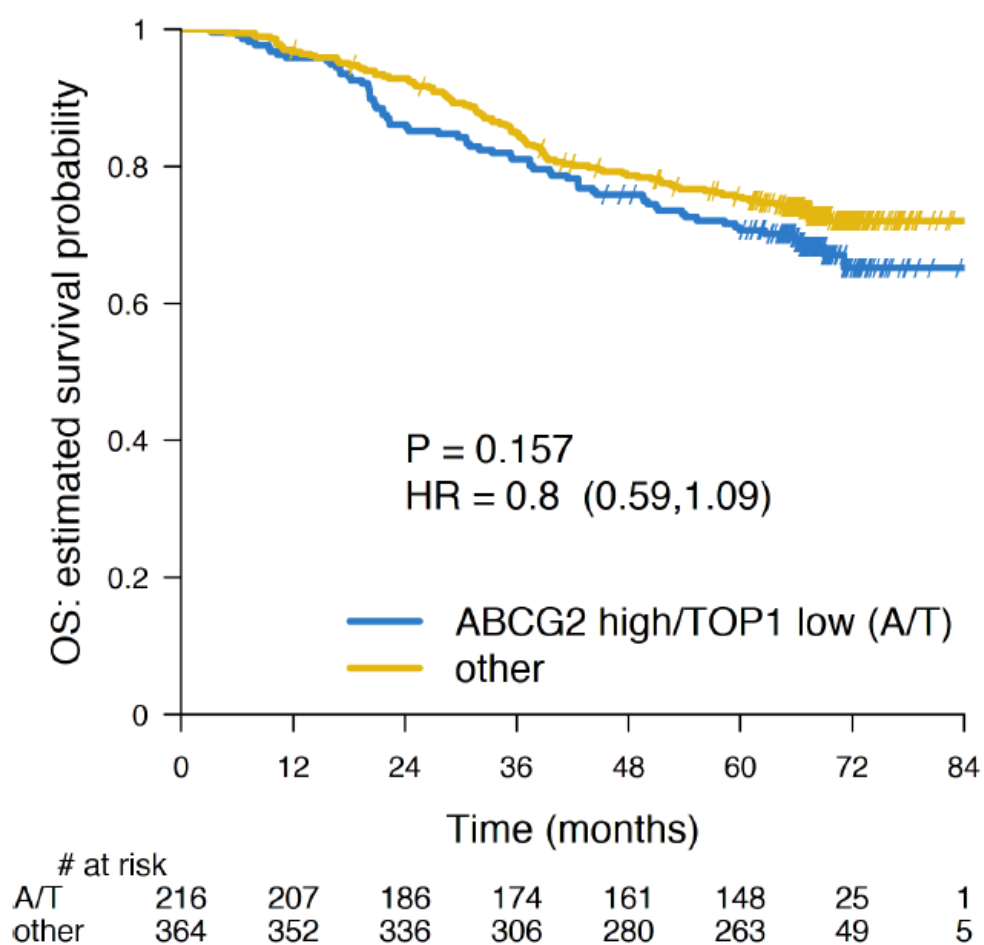

**Figure S5.** OS by biomarker in whole Stage III. OS of all 580 CC patients dichotomized by the biomarker.

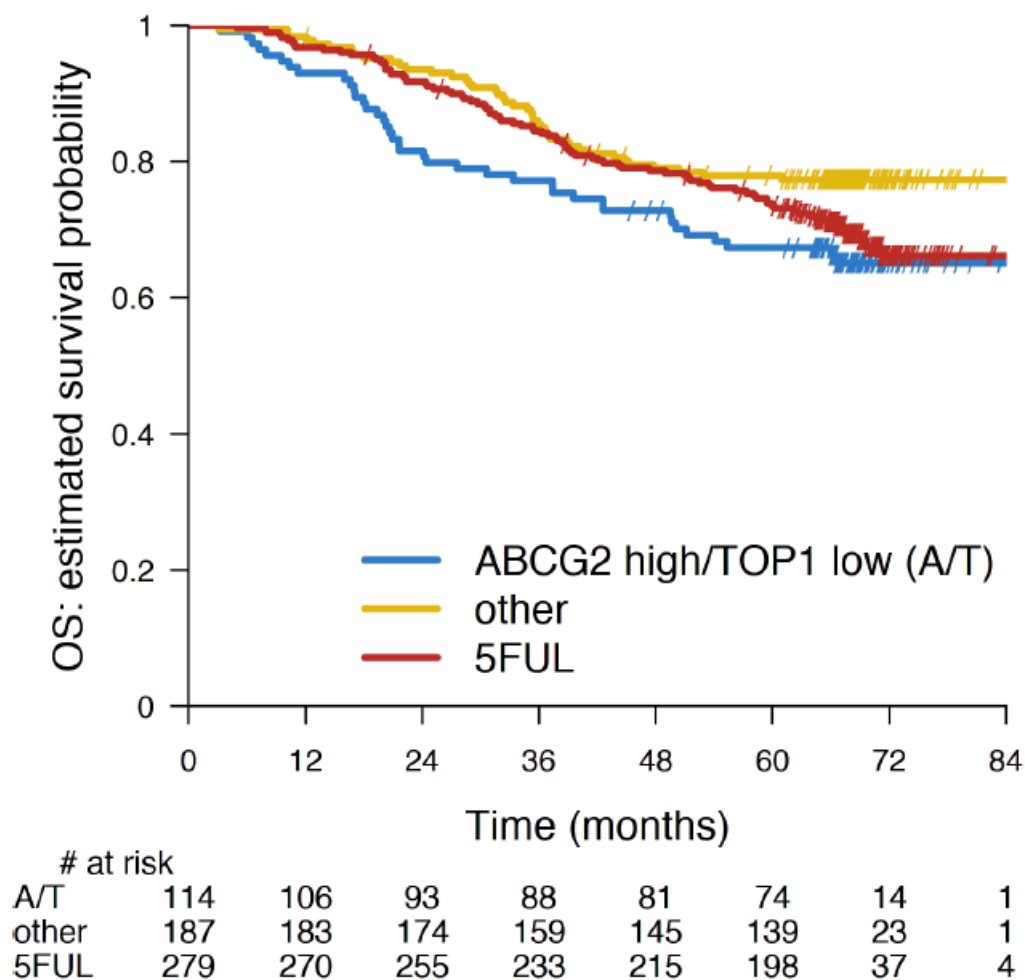

**Figure S6.** OS by biomarker in FOLFIRI arm vs 5FUL arm. This Figure shows the associations between OS and the three subgroups (all 5FUL, FOLFIRI “sensitive” and FOLFIRI “resistant”, respectively. No significant differences were found between the three groups.

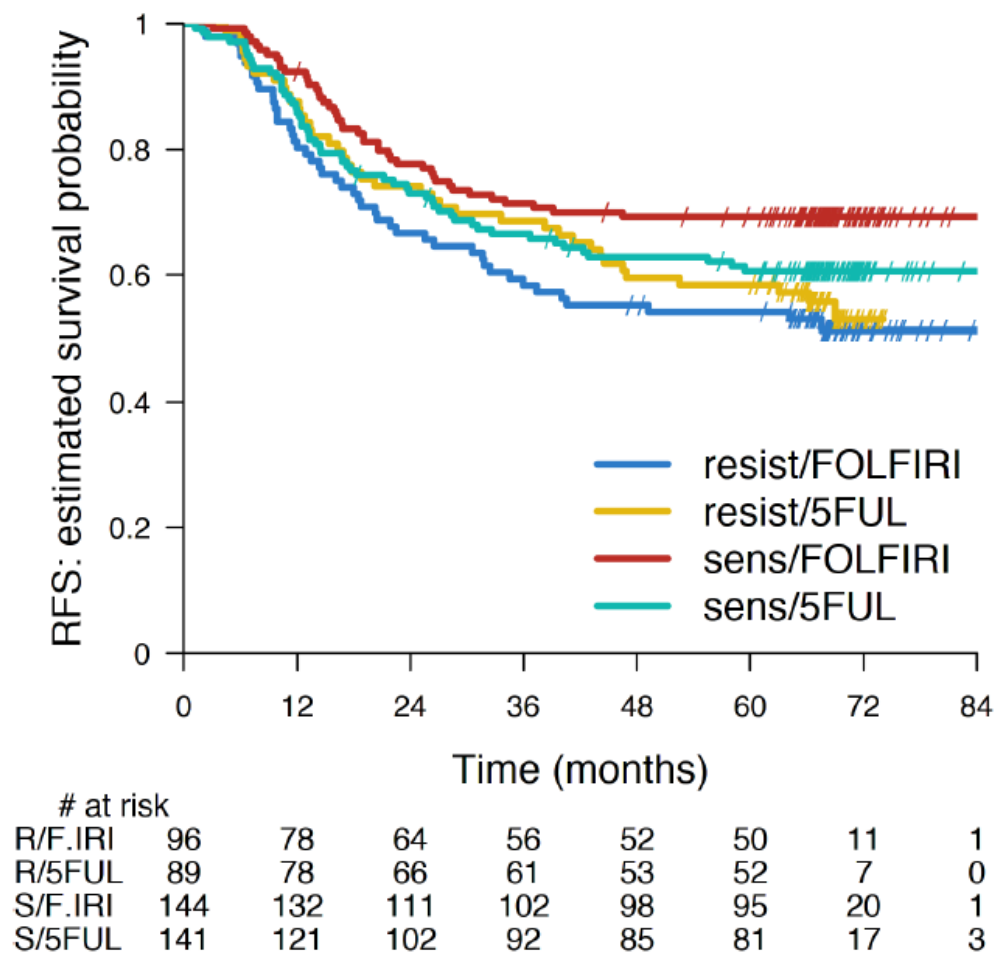

**Figure S7:** RFS stage III/MSS stratified by biomarker and treatment. RFS in MSS patients. The patients were divided into 4 groups representing “sensitive” and “resistant” patients in each of the two treatment arms. Abbreviations: “resistant” under FOLFIRI = “resist/FOLFIRI” = “R/F.IRI”, “sensitive” under 5FUL = “sens/5FUL” = “S/5FUL” etc.

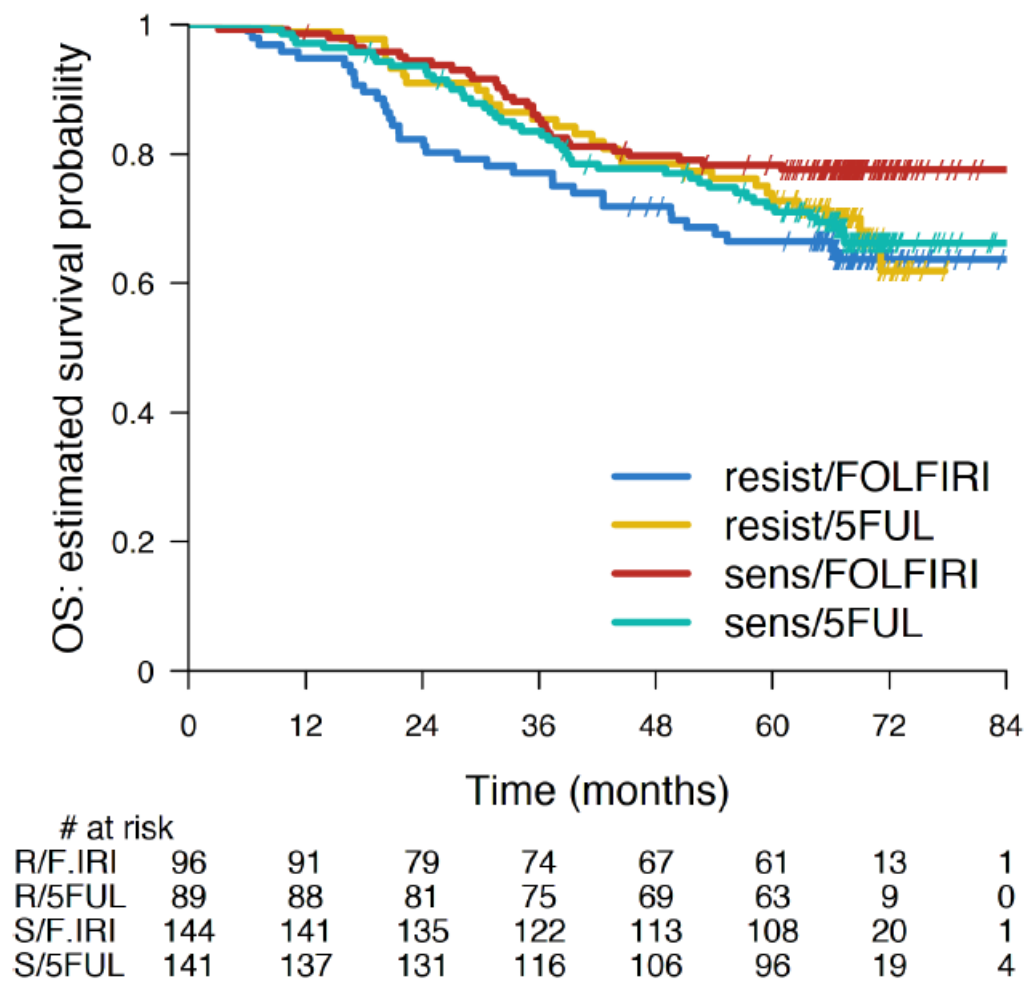

**Figure S8.** OS for stage III/MSS stratified by biomarker and treatment. OS in MSS patients. The patients were divided into 4 groups representing “sensitive” and “resistant” patients in each of the two treatment arms.

### Multivariable Cox regression analyses

The following sections present the results of multivariable analyses and the visualization of the estimated coefficient profiles (from `glmnet` R package). To understand the coding of the variables, the following definitions are needed:

- atb2: ABCG2/TOP1 biomarker, a binary factor with “resistant” and “other” levels
- MSI: MSI-H status, a binary factor with “MSI-H” and “MSS” levels
- BRAF: BRAF V600E mutation status, a binary factor with “mut” and “wt” levels for mutant and wild type, respectively
- KRAS: KRAS codon 12 and 13 mutation status, a binary factor with “mut” and “wt” levels for mutant and wild type, respectively
- site: tumor site, a binary factor with “left” and “right” levels
- mucinous: mucinous histology, a binary factor with “yes” and “no” levels

For each model, full output is provided.



## 2.1. In all Stage II

Call:

```
coxph(formula = Surv(rfs.time, rfs.event) ~ atb2 + MSI + BRAF +
      KRAS + site, data = C)
```

|           | coef   | exp(coef) | se(coef) | z     | p     |
|-----------|--------|-----------|----------|-------|-------|
| atb2other | -0.284 | 0.753     | 0.146    | -1.94 | 0.052 |
| MSIMSS    | 0.518  | 1.679     | 0.293    | 1.77  | 0.077 |
| BRAFwt    | -0.617 | 0.540     | 0.278    | -2.22 | 0.026 |
| KRASwt    | -0.342 | 0.710     | 0.151    | -2.27 | 0.023 |
| siteright | 0.125  | 1.133     | 0.155    | 0.81  | 0.419 |

Likelihood ratio test=17.1 on 5 df, p=0.00435

n= 515, number of events= 196

(65 observations deleted due to missingness)

Coefficients profiles from LASSO penalized regression:

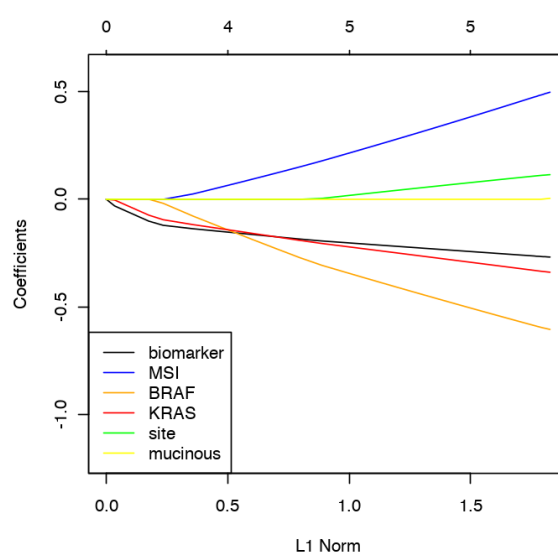

## 2.2. In Stage III/MSS

Call:

```
coxph(formula = Surv(rfs.time, rfs.event) ~ atb2 + BRAF + KRAS +
      site + mucinous, data = C[i.mss, ])
```

|             | coef    | exp(coef) | se(coef) | z     | p     |
|-------------|---------|-----------|----------|-------|-------|
| atb2other   | -0.3335 | 0.7164    | 0.1516   | -2.20 | 0.028 |
| BRAFwt      | -0.5920 | 0.5532    | 0.3198   | -1.85 | 0.064 |
| KRASwt      | -0.3938 | 0.6745    | 0.1559   | -2.53 | 0.012 |
| siteright   | 0.0753  | 1.0782    | 0.1627   | 0.46  | 0.643 |
| mucinousyes | 0.1238  | 1.1317    | 0.1998   | 0.62  | 0.536 |

Likelihood ratio test=16.5 on 5 df, p=0.0056

n= 462, number of events= 181

(8 observations deleted due to missingness)

Coefficients profiles from LASSO penalized regression:

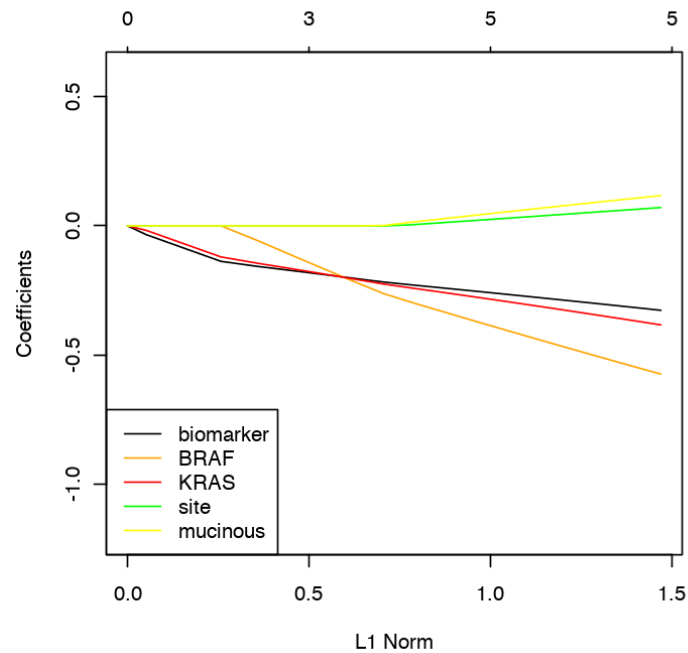

### 2.3. In Stage III/FOLFIRI

With selected variables:

Call:

```
coxph(formula = Surv(rfs.time, rfs.event) ~ atb2 + MSI + BRAF +
      KRAS + site, data = C[i.folfiri, ])
```

|           | coef   | exp(coef) | se(coef) | z     | p     |
|-----------|--------|-----------|----------|-------|-------|
| atb2other | -0.476 | 0.621     | 0.206    | -2.32 | 0.020 |
| MSIMSS    | 0.505  | 1.657     | 0.398    | 1.27  | 0.205 |
| BRAFwt    | -0.940 | 0.391     | 0.374    | -2.51 | 0.012 |
| KRASwt    | -0.437 | 0.646     | 0.216    | -2.03 | 0.043 |
| siteright | 0.263  | 1.301     | 0.213    | 1.24  | 0.216 |

Likelihood ratio test=17.6 on 5 df, p=0.00343

n= 262, number of events= 97

(39 observations deleted due to missingness)

Coefficients profiles from LASSO penalized regression:

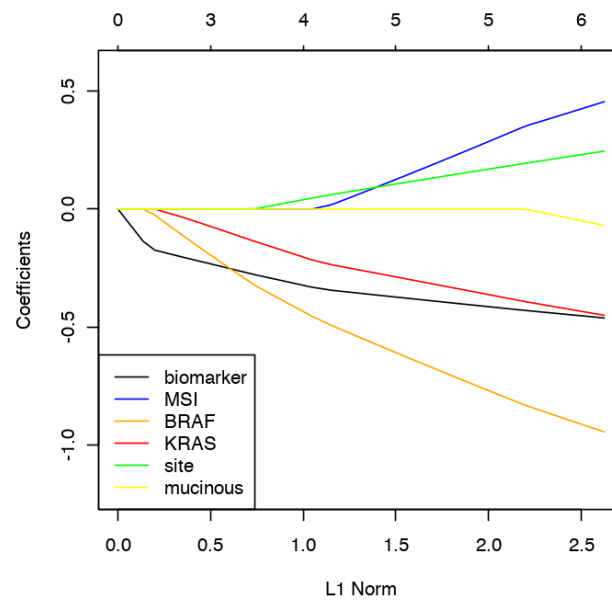

#### 2.4. In Stage III/MSS/FOLFIRI

Call:

```
coxph(formula = Surv(rfs.time, rfs.event) ~ atb2 + BRAF + KRAS +  
      site, data = C[intersect(i.mss, i.folfiri), ])
```

|           | coef   | exp(coef) | se(coef) | z     | p      |
|-----------|--------|-----------|----------|-------|--------|
| atb2other | -0.557 | 0.573     | 0.215    | -2.60 | 0.0094 |
| BRAFwt    | -1.014 | 0.363     | 0.416    | -2.44 | 0.0147 |
| KRASwt    | -0.461 | 0.631     | 0.222    | -2.07 | 0.0380 |
| siteright | 0.233  | 1.263     | 0.218    | 1.07  | 0.2847 |

Likelihood ratio test=18.1 on 4 df, p=0.00118

n= 236, number of events= 89

(4 observations deleted due to missingness)

Coefficients profiles from LASSO penalized regression:

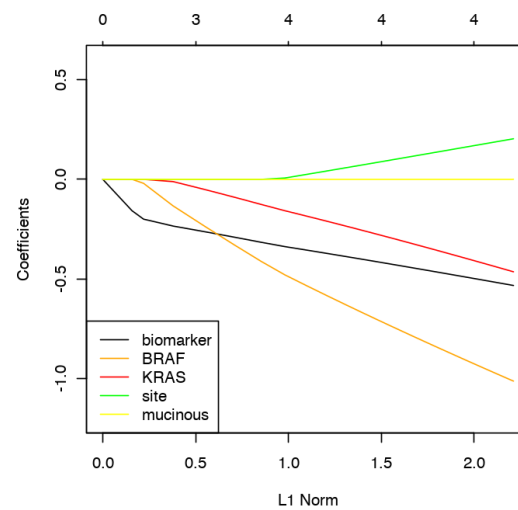

Supplement: s1 [file s1]
